# Supplementary material for: A Third Class: Functional Gibberellin Biosynthetic Operon in Beta-Proteobacteria
Source: Front Microbiol. 2018 Nov 27;9:2916. doi: 10.3389/fmicb.2018.02916 (PMC6278637; doi:10.3389/fmicb.2018.02916)
Supplement: Supplementary file 2 [file Data_Sheet_2.xlsx]

## Sheet: Table S2
Table S2: Genebank accessions and comments on the GA operons found in gamma- and beta-proteobacteria
Organism	Strain	Genebank accession number(s)	Operon	Comments
Erwinia tracheiphila	BuffGH	JXNU01000003	full	Fd, CPS and KS falsly annotated as disrupted
Erwinia tracheiphila	PSU-1	APJK01000129	full
Lonsdalea quercina subsp.iberica	LMG 26265	NZ_LUTQ01000004	full, not functional	CYP112 frame shifted stop codon at amino acid 43, CPS frame shifted stop codon at amino acid 153
Lonsdalea quercina subsp.iberica	LMG 26264T	NZ_LUTP01000008	full, not functional	CYP112 frame shifted stop codon at amino acid 43
Lonsdalea quercina subsp.britanica	LMG 26267T	NZ_LUTN01000005	full, not functional	CYP112, CYP114, CYP115 and IDS frame shifted at amino acid 43 (stop codon), 85, 50, 29 (stop codon) respectivly
Paraburkholderia	sp. UYPR1.413	NZ_JAFD01000178 NZ_JAFD01000250	core, no IDI and CYP115	operon is split at CPS between contigs, IDS is next to transposable element instead of CPS, other contig contains only CPS and KS, SDR pseudogene with frameshift mutation
Paraburkholderia mimosarum	LMG 23256T	NZ_BBJJ01000119	core, no IDI and CYP115
Paraburkholderia	sp. JPY251	NZ_KB890117	core, no IDI and CYP115
Xanthomonas oryzae pv. oryzicola	CFBP7342	CP007221	full	SDR not annotated, but present in full length stop codon overlapping with Fd in different reading frame, CYP115 annotated too short
Xanthomonas oryzae pv. oryzicola	YM15	CP007810	full
Xanthomonas oryzae pv. oryzicola	CFBP7331	CP011958	full	CYP115 annotated too short
Xanthomonas oryzae pv. oryzicola	CFBP7341	CP011959	full	CYP115 annotated too short
Xanthomonas oryzae pv. oryzicola	BAI15	MVFS01000141	full
Xanthomonas oryzae pv. oryzicola	BAI21	MVFU01000053	full
Xanthomonas oryzae pv. oryzicola	BAI20	MVFT01000007	full
Xanthomonas oryzae pv. oryzicola	BLS256	CP003057	full	CYP115 annotated too short
Xanthomonas oryzae pv. oryzicola	B8-12	CP011955	full	CYP115 annotated too short
Xanthomonas oryzae pv. oryzicola	BLS279	AKN98781	full	CYP115 annotated too short
Xanthomonas oryzae pv. oryzicola	L8	CP011960	full	CYP115 annotated too short
Xanthomonas oryzae pv. oryzicola	RS105	CP011961	full	CYP115 annotated too short
Xanthomonas oryzae pv. oryzicola	CFBP2286	CP011962	full	CYP115 annotated too short
Xanthomonas oryzae pv. oryzicola	WHRI 5234	PYJI01000087	full	CYP115 annotated too short
Xanthomonas oryzae pv. oryzicola	BXOR1	NZ_CP011957	full	CYP115 annotated too short
Xanthomonas oryzae pv. oryzicola	CIX44	NZ_LHUH01000433	full	CYP115 annotated too short
Xanthomonas oryzae pv. oryzicola	WHRI 5234	NZ_KZ795274	full	CYP115 annotated too short
Xanthomonas oryzae pv. oryzicola	CFBP2286T	NZ_CP011962	full	CYP115 annotated too short
Xanthomonas oryzae pv. oryzicola	RS105	NZ_CP011961	full	CYP115 annotated too short
Xanthomonas oryzae pv. oryzicola	BLS256	NC_017267	full
Xanthomonas oryzae pv. oryzicola	MAI10	NZ_AYSY01000437 NZ_AYSY01000438	full, functional?	CYP115 annotated too short, contigs span CYP115 to partial Fd and partial SDR to IDI
Xanthomonas translucens pv. translucens	UPB787	JTEM01000033	full	cyp115 411 aa
Xanthomonas translucens pv. translucens	B2	LNSZ01000064	full
Xanthomonas translucens pv. translucens	UPB458	LWSV01000564	full	contig only spans CYP115 to IDS
Xanthomonas translucens pv. translucens	DSM 18974T	LT604072	full
Xanthomonas translucens pv. translucens	SIMT-07	NZ_MADQ01000020	full	CYP115 annotated too short
Xanthomonas translucens pv. translucens	BLSB3	NZ_MADS01000014	full, functional?	CYP115 annotated too short, CYP117 and CPS in assembly gap
Xanthomonas translucens pv. undulosa	Xtu 4699	AKK68437	full
Xanthomonas translucens pv. undulosa	ICMP11055	AVY66067	full
Xanthomonas translucens pv. undulosa	BLSW16	NZ_MADU01000007	probably	CYP115 annotated too short, CPS in assembly gap
Xanthomonas translucens pv. undulosa	NARK-1	NZ_MADT01000034	full	CYP115 annotated too short
Xanthomonas translucens pv. undulosa	ICMP11055	NZ_CP009750	full	CYP115 annotated too short
Xanthomonas translucens pv. graminis	UPB437	NZ_LWSW01000032	full
Xanthomonas translucens pv. graminis	CFBP 2053	NZ_LHSI01000001	full
Xanthomonas translucens pv. graminis	ART-Xtg29	NZ_ANGG01000501	full
Xanthomonas translucens pv. graminis	ART-Xtg2	NZ_FLTV01000193	full
Xanthomonas translucens pv. graminis	ART-Xtg9	NZ_FLTU01000190	full
Xanthomonas translucens pv. graminis	ART-Xtg10	NZ_FLTY01000203	full
Xanthomonas translucens pv. graminis	ART-Xtg29	NZ_FLTW01000197	full
Xanthomonas translucens pv. graminis	ICMP6431	NZ_FLTZ01000183	full
Xanthomonas translucens pv. graminis	NCPPB 3709	NZ_FLUK01000189	full
Xanthomonas translucens	B1	LNTA01000238	full
Xanthomonas translucens	DAR61454	KB316646	full, functional?	CYP112, CYP115 annotated too short
Xanthomonas translucens	LB5	NZ_LNSS01000035	full	CYP115 annotated too short
Xanthomonas translucens	XT-Rocky	NZ_LNST01000036	full	CYP115 annotated too short
Xanthomonas translucens	CS2	NZ_LNVK01000047	full	CYP115 annotated too short
Xanthomonas translucens	CR31	NZ_LNVJ01000025	full	CYP115 annotated too short
Xanthomonas translucens	LB10	NZ_LNVN01000026	full	CYP115 annotated too short
Xanthomonas translucens	LG48	NZ_LNVO01000050	full	CYP115 annotated too short
Xanthomonas translucens	LW16	NZ_LNVQ01000071	full, functional?	CYP115 annotated too short, contig spans CYP115 to partial CPS
Xanthomonas translucens	XT5791	NZ_LNVV01000019	full	CYP115 annotated too short
Xanthomonas translucens	XT5523	NZ_LNVT01000043	full	CYP115 annotated too short
Xanthomonas translucens	CS22	NZ_LNVL01000026	full	CYP115 annotated too short
Xanthomonas translucens	LG54	NZ_LNVP01000025	full	CYP115 annotated too short
Xanthomonas translucens	XT5770	NZ_LNVU01000043	full	CYP115 annotated too short
Xanthomonas translucens	CS4	NZ_LNVM01000057	full	CYP115 annotated too short
Xanthomonas translucens	XT130	NZ_LNVS01000005	full	CYP115 annotated too short
Xanthomonas translucens	P3	NZ_LNVR01000029	full	CYP115 annotated too short
Xanthomonas translucens	XT123	NZ_LNSU01000016	full	CYP115 annotated too short
Xanthomonas translucens pv. arrhenatheri	UPB455	LWSX01000112	full, functional?	CYP115 annotated too short, CYP117 sequence includes non identified nucleotides (N)
Xanthomonas translucens pv. arrhenatheri	LMG727	CXOI01000023	full	CYP115 annotated too short
Xanthomonas translucens pv. phlei	LMG730	CXOJ01000065	full
Xanthomonas translucens pv. poae	LMG728	CXOK01000039	full
Xanthomonas translucens pv. poae	Utah5-P1	NZ_MADP01000056	full	CYP115 annotated too short
Xanthomonas translucens pv. poae	ATCC 33804	NZ_MADN01000051 NZ_MADN01000196	full, functional?	CYP115 only partial gene, one contig spans CYP115 to IDS the other CPS to IDI
Xanthomonas translucens pv. poae	CNC2-P4	NZ_MADO01000077 NZ_MADO01000175	full, functional?	CYP115 only partial gene, one contig spans CYP115 to IDS the other CPS to IDI
Xanthomonas translucens pv. poae	B99	NZ_LWSU01000195	full, functional?	CYP115 only partial gene, CYP117 sequence includes non identified nucleotides (N)
Xanthomonas translucens pv. cerealis	CFBP 2541	NZ_CM003052	full	CYP115 annotated too short
Xanthomonas translucens pv. cerealis	NCPPB1943	NZ_MADM01000003	full	CYP115 annotated too short
Xanthomonas oryzae	X11-5A	LHUJ01000079	full
Xanthomonas axonopodis	DSM 3585T	KPL48135	core plus IDI, no CYP115
Xanthomonas bromi	LMG947T	FLTX01000035	full	LMG947T = CFBP1976T
Xanthomonas bromi	CFBP1976T	MDCE01000012	full	CYP115 annotated too short; LMG947T = CFBP1976T
Xanthomonas theicola	CFBP 4691T	MIGX01000003	full
Pseudomonas psychrotolerans	NS274	LDSQ01000036	core plus CYP115, no IDI
Pseudomonas psychrotolerans	RSA46	LDSU01000038	core plus CYP115, no IDI
Pseudomonas psychrotolerans	NS383	LDST01000034	core plus CYP115, no IDI	CYP112 stop codon at amino acid 132
Pseudomonas psychrotolerans	SB5	LDSY01000027	core plus CYP115, no IDI
Bradyrhizobium japonicum	USDA110	NC_004463.1	core, no IDI and CYP115	CYP115 fragment at 3' of the operon
Mesorhizobium loti	MAFF303099	BA000012	core plus CYP115, no IDI	CYP115 is not localized within the operon, CYP115 fragment at 3' of the operon
Sinorhizobium fredii	NGR234	NC_000914	core, no IDI and CYP115	CYP115 fragment at 3' of the operon
